# Supplementary material
Source: publisher figshare collection journal article supplement (https://acs.figshare.com/ndownloader/files/3872608)
Supplement: Supplementary file 1 [file 3872608]

**Supporting Information for**  
**Superior Removal of Disinfection Byproduct Precursors and Pharmaceuticals from**  
**Wastewater in a Staged Anaerobic Fluidized Membrane Bioreactor Compared to**  
**Activated Sludge**

*Daniel L. McCurry<sup>a</sup>, Samantha E. Bear<sup>b,d</sup>, Jaeho Bae<sup>c</sup>, David L. Sedlak<sup>b,d</sup>, Perry L. McCarty<sup>a,d</sup>,  
William A. Mitch<sup>a,d\*</sup>*

<sup>a</sup> Department of Civil and Environmental Engineering, Stanford University, Jerry Yang and Akiko Yamazaki Energy and Environment Building, 473 Via Ortega, Stanford, CA 94305

<sup>b</sup> Department of Civil and Environmental Engineering, University of California, Berkeley, Berkeley, CA 94720

<sup>c</sup> Department of Environmental Engineering, Inha University, Incheon, Republic of Korea

<sup>d</sup> Engineering Research Center for Re-Inventing the Nation's Urban Water Infrastructure (ReNUWIt), National Science Foundation, Stanford, CA.

\*Corresponding author phone: (650) 725-9298; fax: (650) 723-7058;  
e-mail: [wamitch@stanford.edu](mailto:wamitch@stanford.edu)

**11 Pages**  
**1 Text**  
**6 Tables**  
**1 Figure**

## Contents

**Table S1:** Basic water quality data.

**Text:** Analytical method details

**Table S2:** Compound-Specific Mass Spectroscopy Parameters

**Table S3:** Pharmaceutical and related compound concentrations in wastewater samples prior to chloramination.

**Table S4:** Nitrosamine concentrations in wastewater samples prior to chloramination.

**Table S5:** Halogenated DBP concentrations in wastewater samples prior to chloramination.

**Table S6:** Mean nitrosamine, nitramine, and THM4 concentrations after chloramination.

**Figure S1:** Correlation between pharmaceutical removal in SAF-MBR and logD values.

**Table S1:** Basic water quality data and hydraulic residence times.

| Analyte<br>Sample   | Unit                      | January             |                     |                     | March               |                     |                     | April               |                     |                     |
|---------------------|---------------------------|---------------------|---------------------|---------------------|---------------------|---------------------|---------------------|---------------------|---------------------|---------------------|
|                     |                           | Primary<br>Effluent | Aerobic<br>Effluent | SAF-MBR<br>Effluent | Primary<br>Effluent | Aerobic<br>Effluent | SAF-MBR<br>Effluent | Primary<br>Effluent | Aerobic<br>Effluent | SAF-MBR<br>Effluent |
| DOC                 | mg/L                      | 6.2                 | 4.5                 | 3.2                 | 8.4                 | 5.5                 | 2.9                 | 9.8                 | 4.9                 | 3.4                 |
| UV <sub>254</sub>   | cm <sup>-1</sup>          | 0.145               | 0.102               | 0.048               | 0.169               | 0.120               | 0.045               | 0.264               | 0.114               | 0.057               |
| SUVA <sub>254</sub> | L/mg•m                    | 2.3                 | 2.3                 | 1.5                 | 2.0                 | 2.2                 | 1.5                 | 2.7                 | 2.3                 | 1.7                 |
| Bromide             | µg/L                      | 229                 | 128                 | 109                 | 121                 | 146                 | 107                 | 106                 | 112                 | 102                 |
| Ammonia             | mg/L as N                 | 25.5                | <0.2                | 27.9                | 29.3                | <0.2                | 32.3                | 19.6                | <0.2                | 25.9                |
| Nitrite             | mg/L as N                 | 0.19                | 0.08                | 0.03                | <0.02               | 0.25                | <0.02               | <0.02               | 0.02                | <0.02               |
| Nitrate             | mg/L as N                 | 0.2                 | 7.2                 | <0.1                | <0.1                | 7.2                 | <0.1                | <0.1                | 4.4                 | <0.1                |
| Temperature         | °C                        | 11.0                | NM                  | 11.0                | 17                  | 15.0                | 17                  | 18                  | 15                  | 18                  |
| HRT                 | hrs                       | NA                  | 11.3                | 6.8                 | NA                  | 11.4                | 6.8                 | NA                  | 9.9                 | 6.8                 |
| Alkalinity          | mg/L as CaCO <sub>3</sub> | NM                  | NM                  | NM                  | 210                 | 65.0                | 280                 | 200                 | 90                  | 250                 |
| TCOD                | mg/L                      | 237                 | NM                  | 22                  | 266                 | 74.6                | 53.5                | 232                 | 17.7                | 20.9                |
| TBOD <sub>5</sub>   | mg/L                      | 102                 | NM                  | 9                   | 195                 | 15.1                | 15.5                | 102                 | 0                   | 9.5                 |
| TSS                 | mg/L                      | 82                  | NM                  | 0                   | 72                  | 30.0                | 0                   | 62                  | 2.5                 | 0                   |
| Total Phosphorus    | mg/L as P                 | NM                  | NM                  | NM                  | 3.3                 | 1.8                 | 3.7                 | 2.3                 | 0.4                 | 2.1                 |
| Total Nitrogen      | mg/L as N                 | NM                  | NM                  | NM                  | 40                  | 10.0                | 40                  | 35                  | 4                   | 27                  |
| pH                  | pH Units                  | 6.1                 | 6.9                 | 7.6                 | 7.5                 | 7.2                 | NM                  | 7.5                 | 7.3                 | 7.9                 |

NM = not measured

**Analytical details.** A 1 mL aliquot was reserved for analysis by direct injection in the event that concentrations measured in the SPE extracts exceeded the range of the standard curve. Internal standards (typically 5 ng) were added to the samples prior to solid phase extraction or direct injection. For SPE analysis, samples were extracted onto pre-cleaned (12 mL HPLC-grade methanol) Waters Oasis HLB cartridges. Cartridges were then washed with 6 mL deionized water and eluted with 10 mL of HPLC-grade methanol. Extracts were blown to dryness with N<sub>2</sub> gas. Samples were heated to 40 °C during the drying procedure and reconstituted with deionized water (2 × 0.5 mL); control studies indicated that recoveries ranged from 90-120%.<sup>1</sup> Pharmaceutical compounds were analyzed via liquid chromatography/tandem mass spectrometry (Agilent 6460 triple quadrupole system) using methods modified from Jasper and Sedlak.<sup>2</sup>

Chromatographic separation was accomplished using a 150 mm x 3.00 mm Phenomenex Synergi 4 µm Hydro-RP column. Compounds were eluted with 0.6 mL min<sup>-1</sup> methanol and 0.1% acetic acid in water with a gradient starting at 0% methanol and peaking at 95% methanol for 1 minute starting at 11 minutes (total run time was 17 minutes). Compounds were detected using electrospray ionization (ESI) in positive mode with a 7 ms dwell time and a gas temperature of 350° C, a gas flow rate of 12 L/min at 60 psi, a sheath gas temperature of 400° C at a flow rate of 11 L/min, and a capillary voltage of 3600 V (Table S2).

Preformed monochloramine stocks were formed by titrating sodium hypochlorite into ammonium chloride to achieve a 1:1.2 Cl:N molar ratio, and standardized.<sup>3</sup> After a 3 d reaction time, total chlorine residual was measured by the *N,N*-diethyl-*p*-phenylene-diamine (DPD) colorimetric method,<sup>4</sup> final pH was measured, and residual chlorine was quenched with 33 mg/L ascorbic acid. A 40 mL subsample was acidified to pH 3.5 with 0.5 M H<sub>2</sub>SO<sub>4</sub> and analyzed for halogenated DBPs, including regulated and iodinated trihalomethanes (THMs) and haloacetonitriles (HANs), by solid phase extraction (Varian Bond Elut-PPL cartridges, 200 mg) after spiking with 1,2-dibromopropane as an internal standard.<sup>5</sup> The remaining 450 mL was spiked with deuterated internal standards (20 ng/L *d*<sub>6</sub>-*N*-nitrosodimethylamine and *d*<sub>8</sub>-*N*-nitrosomorpholine), extracted and analyzed for *N*-nitrosamines via gas chromatography/tandem mass spectrometry using a modified version of EPA method 521.<sup>6,7</sup>

## References

1. Jasper, J. T.; Jones, Z.L.; Sharp, J.O.; Sedlak, D.L. Biotransformation of Trace Organic Contaminants in Open-Water Unit Process Treatment Wetlands. *Environ. Sci. Technol.* **2014**, *48*, 5136-5144.
2. Jasper, J. T.; Sedlak, D.L. Phototransformation of Wastewater-Derived Trace Organic Contaminants in Open-Water Unit Process Treatment Wetlands. *Environ. Sci. Technol.* **2013**, *47*, 10781-10790.
3. Schreiber, I.M.; Mitch, W.A. The Influence of the Order of Reagent Addition on *N*-Nitrosodimethylamine Formation. *Environ. Sci. Technol.* **2005**, *39* (10), 3811-3818.
4. Eaton, A. D., Clesceri, L. S., Greenberg, A. E., Eds. *Standard Methods for the Examination of Water and Wastewater*, 20<sup>th</sup> ed.; American Public Health Association, American Water Works Association, Environment Federation Publishers: Washington, DC, 1998.
5. Chinn, R.; Lee, T.; Krasner, S.; Dale, M.; Richardson, S. D.; Pressman, J.; Speth, T.; Miltner, R.; Simmons, J. E. Solid-Phase Extraction of 35 DBPs with Analysis by

GC/ECD and GC/MS. In Proceedings, 2007 Water Quality Conference, Charlotte, NC, 2007; pp. 1–20.

6. Munch, J. W.; Bassett, M. V. *Method 521: Determination of Nitrosamines in Drinking Water by Solid Phase Extraction and Capillary Column Gas Chromatography with Large Volume Injection and Chemical Ionization Tandem Mass Spectrometry (MS/MS)*; U. S. Environmental Protection Agency, Cincinnati, OH, 2004
7. Walse, S. S.; Mitch, W. A. Nitrosamine Carcinogens also Swim in Pools. *Environ. Sci. Technol.* **2008**, 42 (4), 1032-1037.

**Table S2. Compound-Specific Mass Spectroscopy Parameters**

| <b>Compound</b>                                              | <b>Precursor Ion<br/>(M+H)<sup>+</sup><br/>(m/z)</b> | <b>Fragmentor<br/>Voltage (V)</b> | <b>Product<br/>Ions (m/z)</b> | <b>Collision<br/>Energy (V)</b> | <b>Cell Accelerator<br/>Voltage (V)</b> |
|--------------------------------------------------------------|------------------------------------------------------|-----------------------------------|-------------------------------|---------------------------------|-----------------------------------------|
| Abacavir                                                     | 287                                                  | 90                                | 191<br>150                    | 15<br>35                        | 2                                       |
| Abacavir-d4                                                  | 291                                                  | 100                               | 195                           | 15                              | 2                                       |
| Acyclovir                                                    | 226                                                  | 75                                | 152<br>135                    | 10<br>45                        | 2                                       |
| Acyclovir-d4                                                 | 230                                                  | 70                                | 152                           | 10                              | 2                                       |
| Atenolol                                                     | 267                                                  | 130                               | 190<br>145                    | 16<br>24                        | 7                                       |
| Atenolol-d7                                                  | 274                                                  | 130                               | 145                           | 24                              | 7                                       |
| Carbamazepine                                                | 237                                                  | 120                               | 194<br>179                    | 15<br>35                        | 7                                       |
| Carbamazepine-d10                                            | 247                                                  | 120                               | 204                           | 20                              | 7                                       |
| Emtricitabine                                                | 248                                                  | 60                                | 130<br>113                    | 10<br>45                        | 2                                       |
| Emtricitabine- <sup>13</sup> C, <sup>15</sup> N <sub>2</sub> | 251                                                  | 55                                | 133                           | 10                              | 2                                       |
| Lamivudine                                                   | 230                                                  | 65                                | 112<br>95                     | 10<br>45                        | 2                                       |
| Lamivudine- <sup>13</sup> C, <sup>15</sup> N <sub>2</sub>    | 233                                                  | 75                                | 115                           | 10                              | 5                                       |
| Metoprolol                                                   | 268                                                  | 130                               | 116<br>159                    | 14<br>17                        | 7                                       |
| Metoprolol-d7                                                | 275                                                  | 130                               | 123                           | 14                              | 7                                       |
| Metoprolol Acid                                              | 268.1                                                | 130                               | 190.9<br>144.9                | 17<br>25                        | 7                                       |
| Metoprolol Acid-d5                                           | 273.1                                                | 130                               | 196                           | 17                              | 7                                       |
| Propranolol                                                  | 260                                                  | 98                                | 183<br>116                    | 12<br>13                        | 7                                       |
| Propranolol-d7                                               | 267                                                  | 98                                | 116                           | 13                              | 7                                       |
| Sulfamethoxazole                                             | 254                                                  | 110                               | 156<br>92                     | 10<br>25                        | 7                                       |
| Sulfamethoxazole-d4                                          | 258                                                  | 110                               | 96                            | 25                              | 7                                       |
| Trimethoprim                                                 | 291                                                  | 140                               | 261<br>123                    | 17<br>20                        | 7                                       |
| Trimethoprim-d3                                              | 294                                                  | 140                               | 123                           | 20                              | 7                                       |

**Table S3:** Pharmaceutical and related compound concentrations in wastewater samples prior to chloramination.

| Compound         | Class                  | Month   | Primary Effluent | Aerobic Secondary Effluent |           | SAF-MBR Effluent |           | Average % reduction<br>p-value |
|------------------|------------------------|---------|------------------|----------------------------|-----------|------------------|-----------|--------------------------------|
|                  |                        |         | ng/L             | ng/L                       | % removal | ng/L             | % removal |                                |
| Abacavir         | anti-viral             | January | 18               | <1                         | 100%      | <1               | 100%      | 0.4226                         |
|                  |                        | March   | 26               | <1                         | 100%      | 1                | 96%       |                                |
|                  |                        | April   | 37               | 14                         | 62%       | 14               | 62%       |                                |
| Acyclovir        | anti-viral             | January | 705              | 154                        | 78%       | 25               | 96%       | 0.0012                         |
|                  |                        | March   | 701              | 194                        | 72%       | 40               | 94%       |                                |
|                  |                        | April   | 418              | 215                        | 49%       | 23               | 94%       |                                |
| Atenolol         | beta-blocker           | January | 643              | 440                        | 32%       | 9                | 99%       | < 0.001                        |
|                  |                        | March   | 469              | 432                        | 8%        | <25              | 100%      |                                |
|                  |                        | April   | 370              | 299                        | 19%       | 6                | 98%       |                                |
| Carbamazepine    | anti-convulsant        | January | 184              | 153                        | 17%       | 5                | 97%       | < 0.001                        |
|                  |                        | March   | 108              | 152                        | -41%      | <25              | 100%      |                                |
|                  |                        | April   | 123              | 133                        | -8%       | 5                | 96%       |                                |
| Emtricitabine    | anti-viral             | January | 8                | <5                         | 100%      | 13               | -63%      | 0.6505                         |
|                  |                        | March   | <5               | 21                         | NA        | <5               | NA        |                                |
|                  |                        | April   | 30               | 16                         | 47%       | 5                | 83%       |                                |
| Lamivudine       | anti-viral             | January | 86               | 12                         | 86%       | 1                | 99%       | 0.0105                         |
|                  |                        | March   | 95               | 26                         | 73%       | <1               | 100%      |                                |
|                  |                        | April   | 96               | 32                         | 67%       | 10               | 90%       |                                |
| Metoprolol       | beta-blocker           | January | NQ               | 6                          | NA        | <1               | NA        | 0.0047                         |
|                  |                        | March   | NQ               | 4                          | NA        | 1                | NA        |                                |
|                  |                        | April   | NQ               | 2                          | NA        | <1               | NA        |                                |
| Metoprolol Acid  | transformation product | January | NQ               | 558                        | NA        | 27               | NA        | < 0.001                        |
|                  |                        | March   | 214              | 305                        | -43%      | <12              | 100%      |                                |
|                  |                        | April   | 113              | 211                        | -87%      | <12              | 100%      |                                |
| Propranolol      | beta-blocker           | January | NQ               | 42                         | NA        | <0.3             | NA        | 0.0016                         |
|                  |                        | March   | 38               | 50                         | -32%      | <12              | 100%      |                                |
|                  |                        | April   | NQ               | 57                         | NA        | 0.3              | NA        |                                |
| Sulfamethoxazole | antibiotic             | January | 276              | 117                        | 58%       | 33               | 88%       | 0.0021                         |
|                  |                        | March   | 272              | 39                         | 86%       | <15              | 100%      |                                |
|                  |                        | April   | 207              | 117                        | 43%       | 19               | 91%       |                                |
| Trimethoprim     | antibiotic             | January | NQ               | 101                        | NA        | <0.4             | NA        | 0.0123                         |
|                  |                        | March   | 3                | 31                         | -933%     | <19              | NA        |                                |
|                  |                        | April   | NQ               | 36                         | NA        | 0.4              | NA        |                                |

NQ = not quantifiable due to matrix interference

NA = not applicable due to non-quantifiable primary effluent sample

**Table S4:** Nitrosamine concentrations in wastewater samples prior to chloramination. Average recoveries of the two deuterated internal standards (d<sub>6</sub>-NDMA and d<sub>8</sub>-NMOR) were 77% and 76%, respectively. Average nitrosamine recovery from wastewater matrix spikes (20 ng/L) was 94% (range 67-131%).

| Sampling Date | Effluent Type | NDMA | NMEA | DMNA | NDEA | NDPA | NPIP | NPYR | NMOR | NDBA |
|---------------|---------------|------|------|------|------|------|------|------|------|------|
| January       | Primary       | 3.5  | <2   | 13.6 | NQ   | 2.7  | 3.7  | <2   | 35.7 | <2   |
|               | Aerobic       | 8.9  | 2.3  | 16.6 | NQ   | <2   | 2.3  | <2   | 30.2 | <2   |
|               | SAF-MBR       | <2   | 4.7  | 6.5  | NQ   | 4.4  | <2   | <2   | 3.5  | 3.7  |
| March         | Primary       | 18.6 | 12.0 | 15.2 | NQ   | 18.7 | 13.7 | <2   | 33.9 | 6.1  |
|               | Aerobic       | 19.5 | 8.8  | 17.4 | NQ   | 15.4 | 11.7 | <2   | 24.9 | 11.9 |
|               | SAF-MBR       | 4.3  | 13.0 | 2.5  | NQ   | 25.1 | 17.0 | <2   | 4.0  | 5.5  |
| April         | Primary       | 12.1 | 10.1 | 24.2 | NQ   | 10.3 | 5.1  | <2   | 19.0 | 13.2 |
|               | Aerobic       | 11.3 | 3.9  | 33.7 | NQ   | 3.5  | <2   | <2   | 21.3 | <2   |
|               | SAF-MBR       | 3.4  | 5.4  | 29.3 | NQ   | 9.0  | <2   | <2   | 3.3  | 2.3  |

NM = not measured

NQ = not quantified due to matrix interference



**Table S5:** Halogenated DBP concentrations in wastewater samples prior to chloramination. Average recovery of halogenated DBPs from wastewater matrix spikes (40 µg/L) was 83% (range 69-106%).

| Sampling Date | Effluent Type | Chloroform | BDCM | DBCM | Bromoform | 1,1-DCP | 1,1,1-TCP | TCNM | DCAN | BCAN | DBAN | DCIM | BCIM | DBIM | TIM |
|---------------|---------------|------------|------|------|-----------|---------|-----------|------|------|------|------|------|------|------|-----|
| January       | Primary       | 5.5        | <1   | <1   | 2.0       | <1      | <1        | <1   | <1   | <1   | <1   | <1   | <1   | <1   | <1  |
|               | Aerobic       | 3.7        | <1   | <1   | <1        | <1      | <1        | <1   | <1   | <1   | <1   | <1   | <1   | <1   | <1  |
|               | SAF-MBR       | 2.7        | <1   | <1   | 3.1       | <1      | <1        | <1   | <1   | <1   | <1   | <1   | <1   | <1   | <1  |
| March         | Primary       | NM         | <1   | <1   | 4.6       | <1      | <1        | <1   | <1   | <1   | <1   | <1   | <1   | <1   | <1  |
|               | Aerobic       | 15.7       | <1   | <1   | <1        | <1      | <1        | <1   | <1   | <1   | <1   | <1   | <1   | <1   | <1  |
|               | SAF-MBR       | 16.7       | <1   | <1   | <1        | <1      | <1        | <1   | <1   | <1   | <1   | <1   | <1   | <1   | <1  |
| April         | Primary       | 32.2       | <1   | <1   | 1.4       | <1      | <1        | <1   | <1   | <1   | <1   | <1   | <1   | <1   | <1  |
|               | Aerobic       | 10.7       | <1   | <1   | <1        | <1      | <1        | <1   | <1   | <1   | <1   | <1   | <1   | <1   | <1  |
|               | SAF-MBR       | 16.6       | <1   | <1   | <1        | <1      | <1        | <1   | <1   | <1   | <1   | <1   | <1   | <1   | <1  |

NM = Not measured

N.B.: All other analytes were not detected in all samples

**Table S6:** Mean nitrosamine, nitramine, and THM4 concentrations after chloramination. Standard deviations of experimental replicate values presented when available (n = 2 - 3).

| Compound | Class          | Month   | Mean Concentrations (ng/L) |           |                            |           |           |                  |           |           |             | % reduction |
|----------|----------------|---------|----------------------------|-----------|----------------------------|-----------|-----------|------------------|-----------|-----------|-------------|-------------|
|          |                |         | Primary Effluent           |           | Aerobic Secondary Effluent |           |           | SAF-MBR Effluent |           |           | % reduction | vs aerobic  |
|          |                |         | Mean                       | Std. Dev. | Mean                       | Std. Dev. | % removal | ng/L             | Std. Dev. | % removal | vs aerobic  | p-value     |
| NDMA     | Nitrosamine    | January | 13.2                       |           | 5.8                        |           | 56%       | 3.7              |           | 72%       | 36%         | 0.0137      |
|          |                | March   | 20.5                       |           | 31.8                       | 4.6       | -55%      | 14.3             | 0.6       | 30%       | 55%         |             |
|          |                | April   | 15.7                       | 0.1       | 23.7                       | 2.1       | -51%      | 12.4             | 1.6       | 21%       | 48%         |             |
| NMOR     | Nitrosamine    | January | 14.2                       |           | 14.9                       |           | -5%       | 3.7              |           | 74%       | 75%         | 0.0011      |
|          |                | March   | 31.2                       | 1.9       | 26.9                       | 5.9       | 14%       | 5.2              | 0.1       | 83%       | 81%         |             |
|          |                | April   | 22.3                       | 3.0       | 23.8                       | 7.1       | -7%       | 3.7              | 0.5       | 83%       | 84%         |             |
| DMNA     | Nitramine      | January | 12.2                       |           | 3.7                        |           | 70%       | 4.5              |           | 63%       | -22%        | 0.9037      |
|          |                | March   | 15.2                       | 0.4       | 17.1                       | 1.1       | -13%      | 9.9              | 0.3       | 100%      | 42%         |             |
|          |                | April   | 27.6                       | 0.2       | 32.2                       | 0.1       | -17%      | 41.8             | 4.2       | -51%      | -30%        |             |
| THM4     | Trihalomethane | January | 28.7                       |           | 32.1                       |           | -12%      | 9                |           | 69%       | 72%         | 0.5211      |
|          |                | March   | 101.3                      | 34        | 54.7                       | 3.2       | 46%       | 76.8             | 16        | 24%       | -40%        |             |
|          |                | April   | 59.5                       | 14        | 89.7                       | 2.3       | -51%      | 47.2             | 21        | 21%       | 47%         |             |

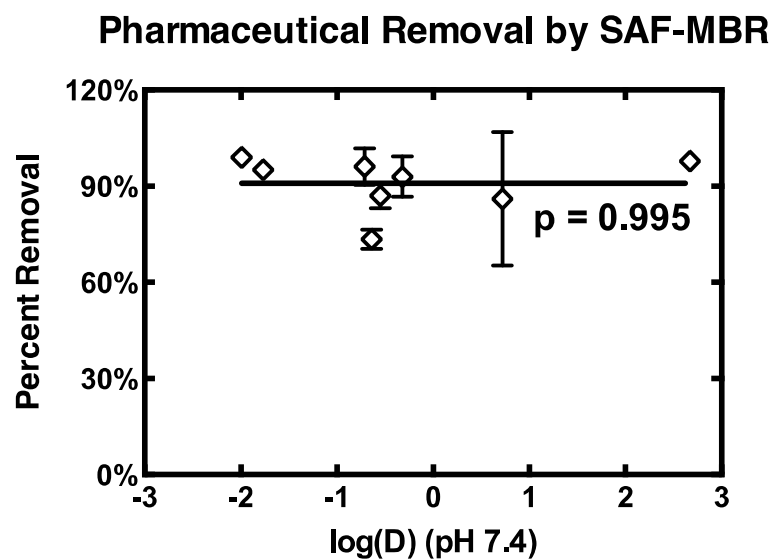

**Figure S1:** Correlation of percent removal of pharmaceuticals between primary effluent and SAF-MBR effluent with pH-corrected logD values. LogD values, representing the  $\log K_{ow}$  (octanol-water partition constant) values corrected to pH 7.4, were calculated using ACD/Labs Percepta software.
